# Supplementary material
Source: publisher site journal article supplement (https://cdn.jamanetwork.com/ama/content_public/journal/oncology/936624/coi170066supp2_prod.xlsx)
Supplement: Supplementary file 1 [file coi170066supp2_prod.xlsx]

## Sheet: new table
Study	IRB Committee	Informed Consent
VAN	University of British Columbia - British Columbia Cancer Agency Research Ethics Board	Some cases Yes and some cases No / pathology material
AOV	Alberta Health Services, Research Ethics	No / pathology material
SEA	Cambridgeshire 4 Research Ethics Committee	Yes
MAY1	Institutional Review Board of Mayo Clinic	Yes
NOT	National Health Service National Research Ethics Service Derbyshire Research Ethics Committee	No / pathology material
MAY2	Institutional Review Board of Mayo Clinic	Yes
STA	Stanford University Administrative Panel on Human Subjects in Medical Research	Yes
LAX	Institutional Review Board 3 of Cedars-Sinai Medical Center	Yes
BAV	Ethics Committee of the Friedrich-Alexander-University Erlangen-Nuremberg	Yes
WMH	NSW Government Health. Western Sydney LocalHealth District, Human Research Ethics Committee	Yes
TUE	Ethics-Committee at the Medical Faculty and at the University Hospital of Tübingen	Yes
TVA	University of Calgary, Conjoint Health Research Ethics Committee	Yes
POC	Bioethical Committee of Pomeranian Medical University	Yes
HAW	University of Hawaii, Committee on Human Studies	Yes
CNI	Bioethics and Animal Welfare Committee of the Carlos III Health Institute	Yes
BRZ	Research Ethics Committee of Hospital das Clínicas of the Ribeirão Preto Medical School	No / pathology material
UKO	National Health Service Central Office for Research Ethics Committees (COREC) and The Joint University College London/University College London Hospital Committee on the Ethics of Human Research (Committee A)	Yes
CAL	University of Calgary, Faculty of Medicine, Office of Medical Bioethics	No / pathology material
AOC	Peter MacCallum Cancer Centre Human Research Ethics Committee	Yes
GER	Ethics Committee of the Heidelberg University Clinic	Yes
MAL	Scientific Ethics Committees for Copenhagen and Frederiksberg municipalities and the Danish Data Protection Agency	Yes
SOC	Peter MacCallum Cancer Centre Human Research Ethics Committee	Yes
HOP	University of Pittsburgh Insititutional Review Board and Roswell Park Cancer Institute Insititutional Review Board	Yes
